# Supplementary material
Source: MDPI journal article supplement (https://www.mdpi.com/2673-3897/3/4/22)

Supplementary Table S1. Characteristics of subjects<sup>1</sup> and endometrial biopsies in the study

| Serial no.                                 | Subject ID | Age | Cycle day | Histology | Diagnosis | Final selection |
|--------------------------------------------|------------|-----|-----------|-----------|-----------|-----------------|
| <i>Group 1 (Control, No endometriosis)</i> |            |     |           |           |           |                 |
| 1                                          | 4          | 24  | 24        | MSE       | NAD       | Yes             |
| 2                                          | 10         | 27  | 24        | MSE       | NAD       | Yes             |
| 3                                          | 14         | 30  | 20        | MSE       | NAD       | Yes             |
| 4                                          | 20         | 31  | 30        | AE        | AEB, LM   | No              |
| 5                                          | 22         | 34  | 20        | MSE       | NAD       | Yes             |
| 6                                          | 23         | 36  | 20        | MSE       | NAD       | Yes             |
| 7                                          | 26         | 37  | 20        | AE        | LM        | No              |
| 8                                          | 28         | 29  | 26        | DyRM      | EP        | No              |
| 9                                          | 30         | 37  | 22        | MSE       | NAD       | Yes             |
| 10                                         | 37         | 33  | 22        | MSE       | EP        | No              |
| 11                                         | 39         | 32  | 25        | MSE       | NAD       | Yes             |
| 12                                         | 45         | 24  | 20        | MSE       | NAD       | Yes             |
| 13                                         | 48         | 28  | 23        | MSE       | NAD       | Yes             |

|    |      |    |    |     |     |     |
|----|------|----|----|-----|-----|-----|
| 14 | 59   | 29 | 26 | LSE | NAD | No  |
| 15 | 64   | 27 | 20 | AE  | LM  | No  |
| 16 | EM1  | 36 | 26 | MSE | NAD | Yes |
| 17 | EM63 | 33 | 24 | MSE | NAD | Yes |

---

*Group 2 (Ovarian endometriosis, stage IV)*

|    |      |    |    |      |        |     |
|----|------|----|----|------|--------|-----|
| 1  | 72   | 36 | 18 | MSE  | NAD    | Yes |
| 2  | 75   | 32 | 20 | MSE  | NAD    | Yes |
| 3  | 78   | 28 | 20 | MSE  | NAD    | Yes |
| 4  | 86   | 31 | 20 | MSE  | NAD    | Yes |
| 5  | 011  | 30 | 24 | MSE  | NAD    | Yes |
| 6  | 0111 | 36 | 24 | MSE  | NAD    | Yes |
| 7  | 112  | 32 | 26 | DyRM | AM     | No  |
| 8  | 113  | 35 | 22 | MSE  | NAD    | Yes |
| 9  | 114  | 31 | 20 | MSE  | NAD    | Yes |
| 10 | 115  | 26 | 20 | DyRM | AM     | No  |
| 11 | 119  | 22 | 20 | ESE  | EP, LM | No  |
| 12 | 120  | 33 | 24 | MSE  | NAD    | Yes |

|    |     |    |    |      |     |     |
|----|-----|----|----|------|-----|-----|
| 13 | 126 | 33 | 22 | AE   | AM  | No  |
| 14 | 128 | 28 | 18 | MSE  | NAD | Yes |
| 15 | 129 | 32 | 18 | DyRM | AEB | No  |
| 16 | 130 | 24 | 20 | DyRM | LM  | No  |
| 17 | 131 | 26 | 18 | AE   | AM  | No  |
| 18 | 134 | 32 | 26 | MSE  | NAD | Yes |
| 19 | 135 | 35 | 22 | MSE  | NAD | Yes |
| 20 | 137 | 28 | 25 | MSE  | NAD | Yes |

---

<sup>1</sup>all subjects were recruited from Infertility clinic and had been suffering from primary infertility.

AE, atrophic endometrium; AEB, abnormal endometrial bleeding; AM, adenomyosis; DyRM, dysregulated maturation; EP, endometrial polyp; ESE, early secretory phase endometrium; LM, leiomyoma; LSE, late secretory phase endometrium; MSE, mid-secretory phase endometrium; NAD, no abnormality detected.

Supplementary Figure S1. Composite plate of representative photomicrographs at low magnification for ErbBs1-4 immunostaining in MSE obtained from both groups. Bar: 100  $\mu$ m.

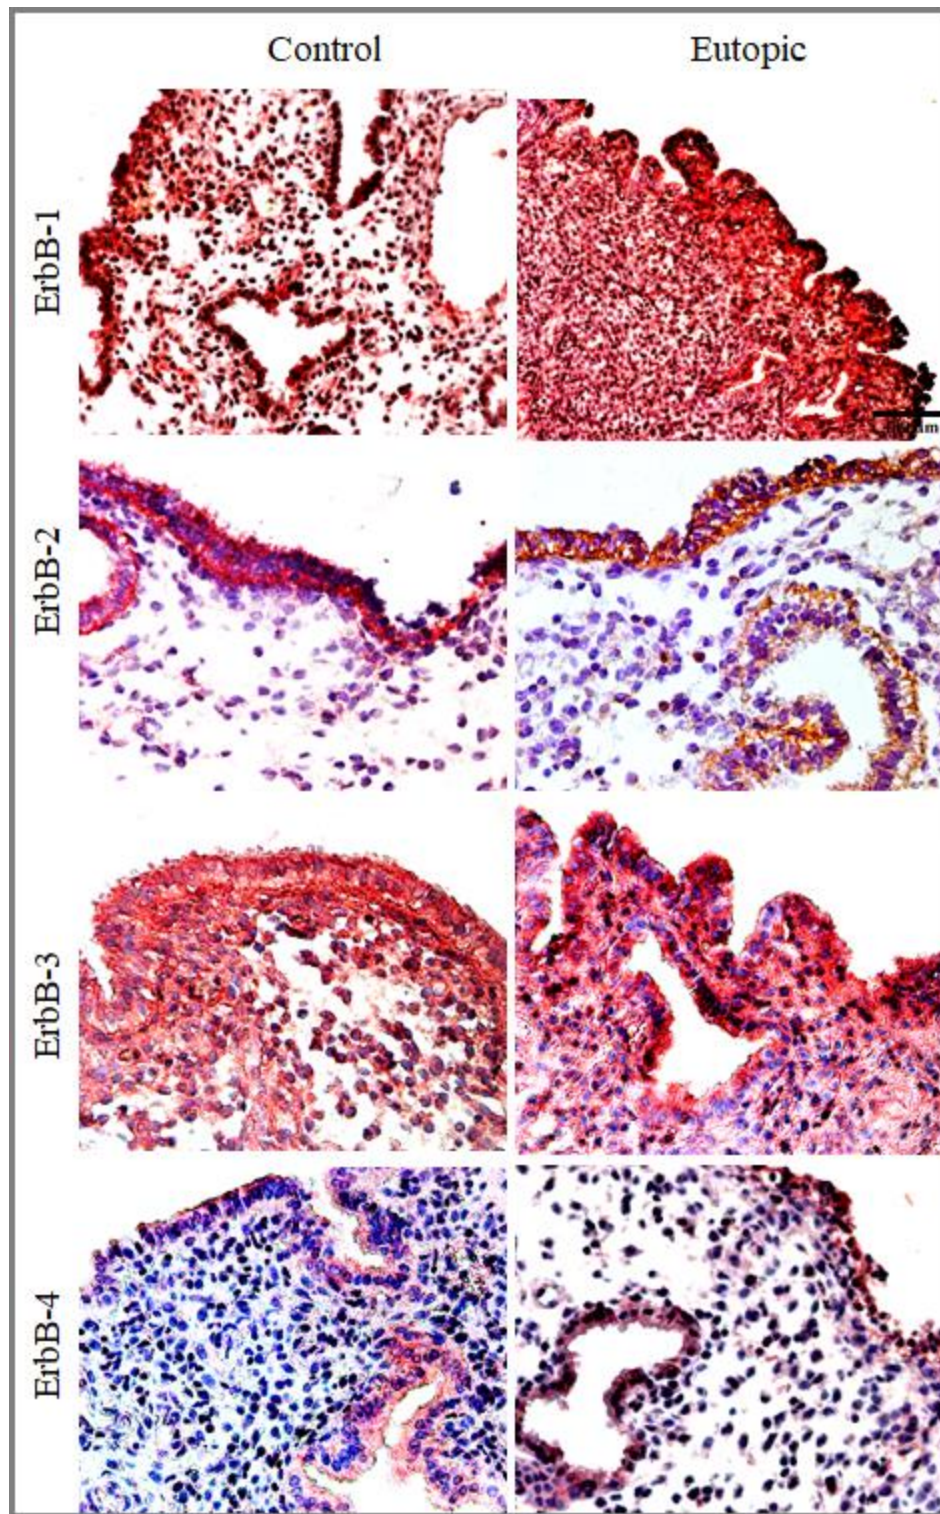

Supplement: s1 [file s1]
